# Supplementary material for: Identification of allergens for food-dependent exercise-induced anaphylaxis to shrimp
Source: Sci Rep. 2021 Mar 8;11:5400. doi: 10.1038/s41598-021-84752-2 (PMC7940642; doi:10.1038/s41598-021-84752-2)
Supplement: Supplementary file 1 — Supplementary Information [file 41598_2021_84752_MOESM1_ESM.pdf]

# Identification of allergens for food-dependent exercise-induced anaphylaxis to shrimp

Shiori Akimoto<sup>1</sup>, Tomoharu Yokooji<sup>1,2\*</sup>, Ryohei Ogino<sup>3</sup>, Yuko Chinuki<sup>3</sup>, Takanori Taogoshi<sup>1</sup>, Atsuko Adachi<sup>4</sup>, Eishin Morita<sup>3</sup>, Hiroaki Matsuo<sup>1</sup>

<sup>1</sup>Department of Pharmaceutical Services, Graduate School of Biomedical and Health Sciences, Hiroshima University, Hiroshima, Japan

<sup>2</sup>Department of Frontier Science for Pharmacotherapy, Graduate School of Biomedical and Health Sciences, Hiroshima University, Hiroshima, Japan

<sup>3</sup>Department of Dermatology, Faculty of Medicine, Shimane University, Izumo, Japan

<sup>4</sup>Department of Dermatology, Hyogo Prefectural Kakogawa Medical Center, Kakogawa, Japan

**\*Corresponding author:** Tomoharu Yokooji, PhD

Department of Pharmaceutical Services, Graduate School of Biomedical and Health Sciences, Hiroshima University, 1-2-3 Kasumi, Minami-ku, Hiroshima 734-8553, Japan.

Tel: +81-82-257-5295, E-mail: yokooji@hiroshima-u.ac.jp

## Western blotting

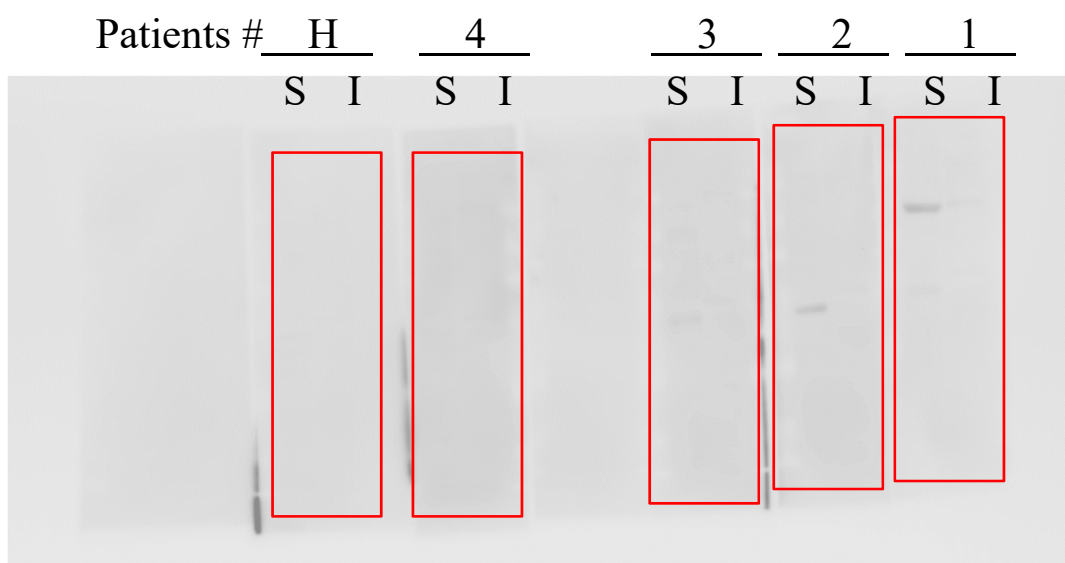

## CBB staining

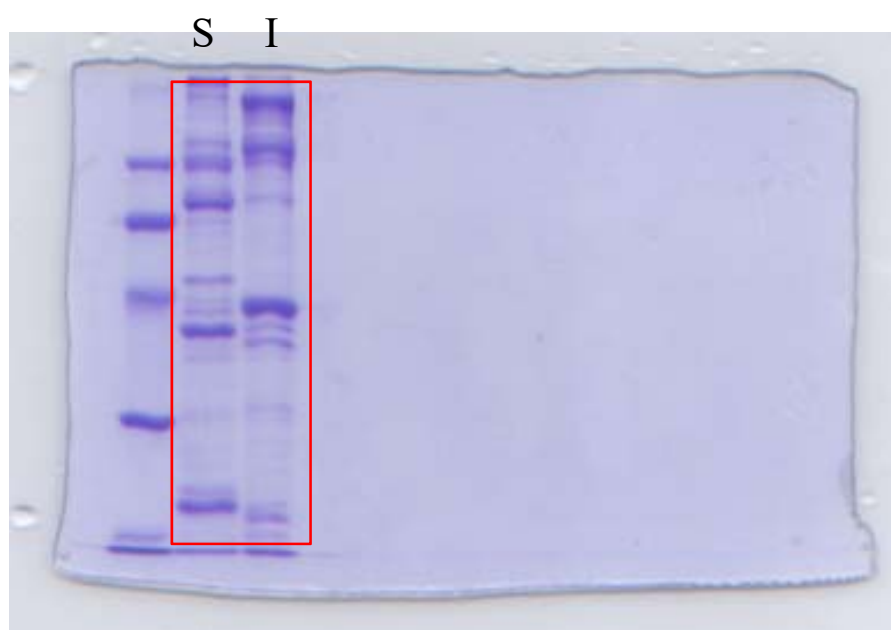

S: Tris-soluble fraction  
I: Tris-insoluble fraction  
H: healthy subject

## **Supplementary Figure S1. Uncropped images of Figure 1.**

Red boxes denote the areas shown in Figure 1.

## Western blotting

Healthy subject

Patient #1

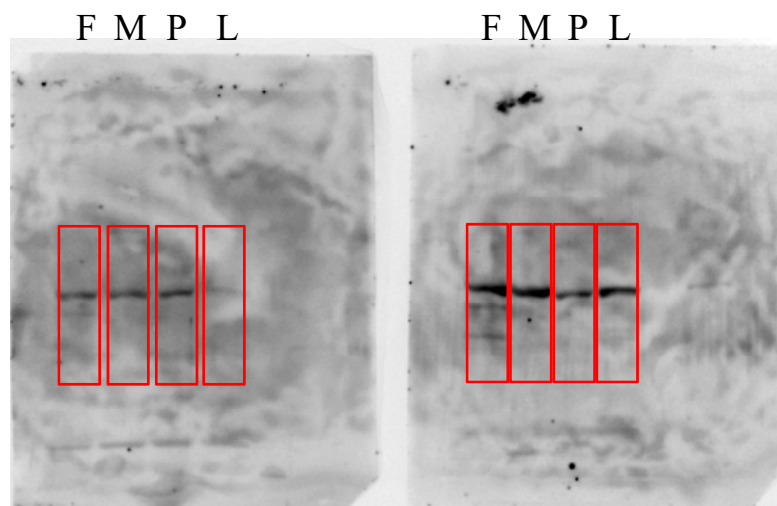

Healthy subject

Patient #2

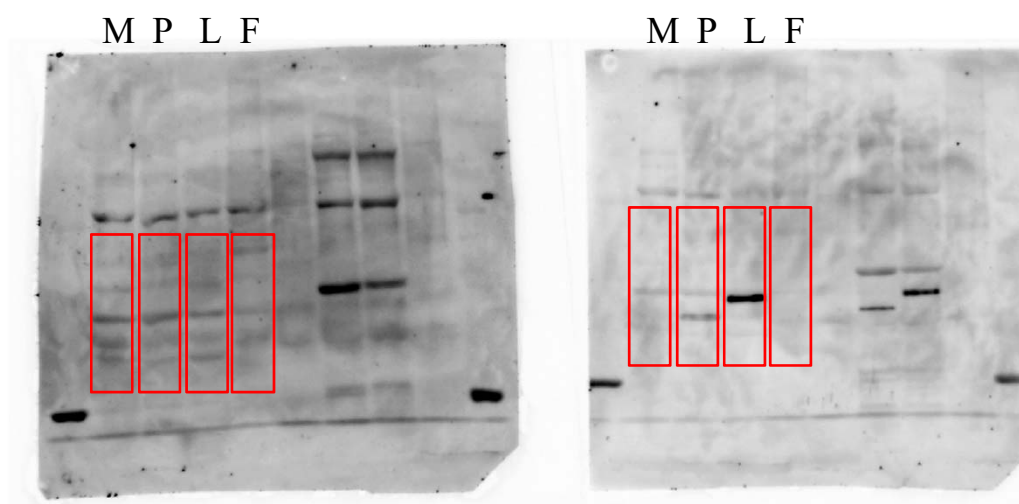

## CBB staining

M P L F

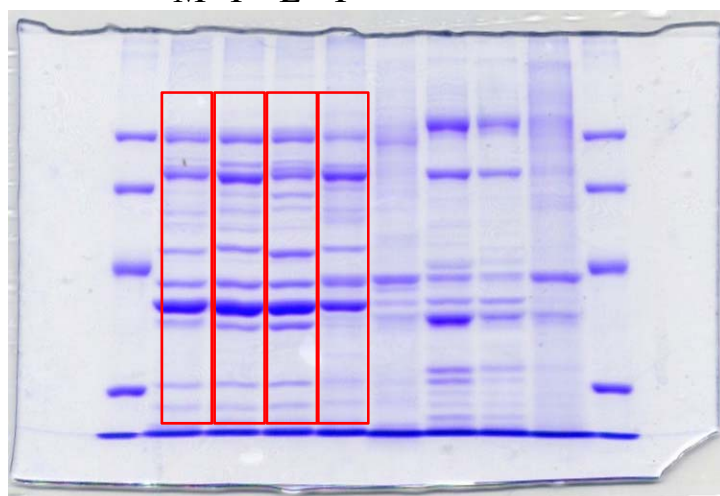

F: Fenneropenaeus chinensis  
M: Marsupenaeus japonicus  
P: Penaeus monodon  
L: Litopenaeus vannamei

**Supplementary Figure S2. Uncropped images of Figure 2.**  
Red boxes denote the areas shown in Figure 2.

Western blotting

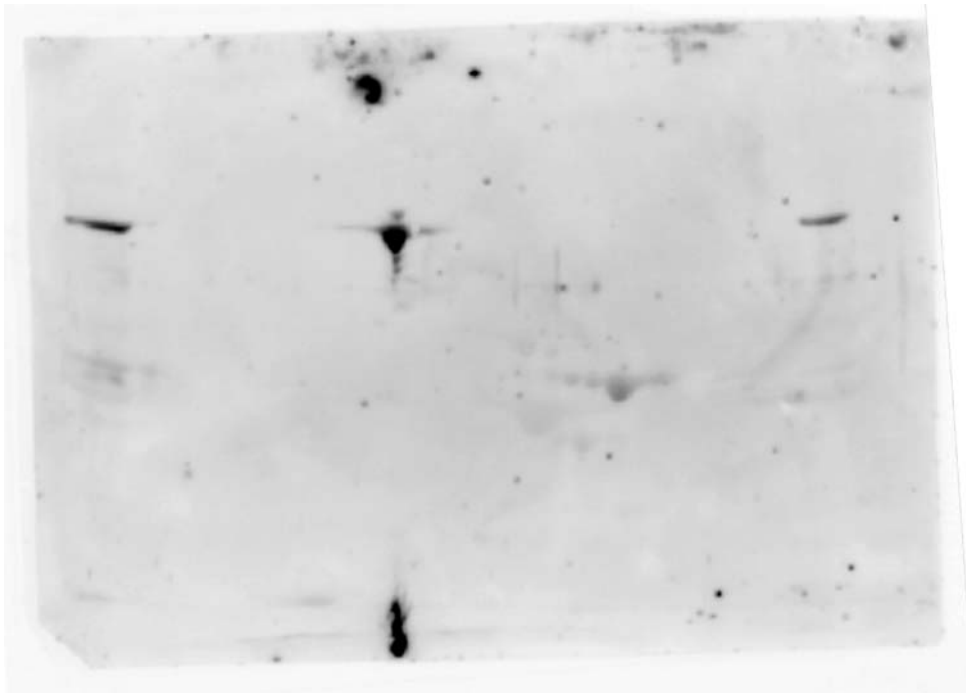

CBB staining

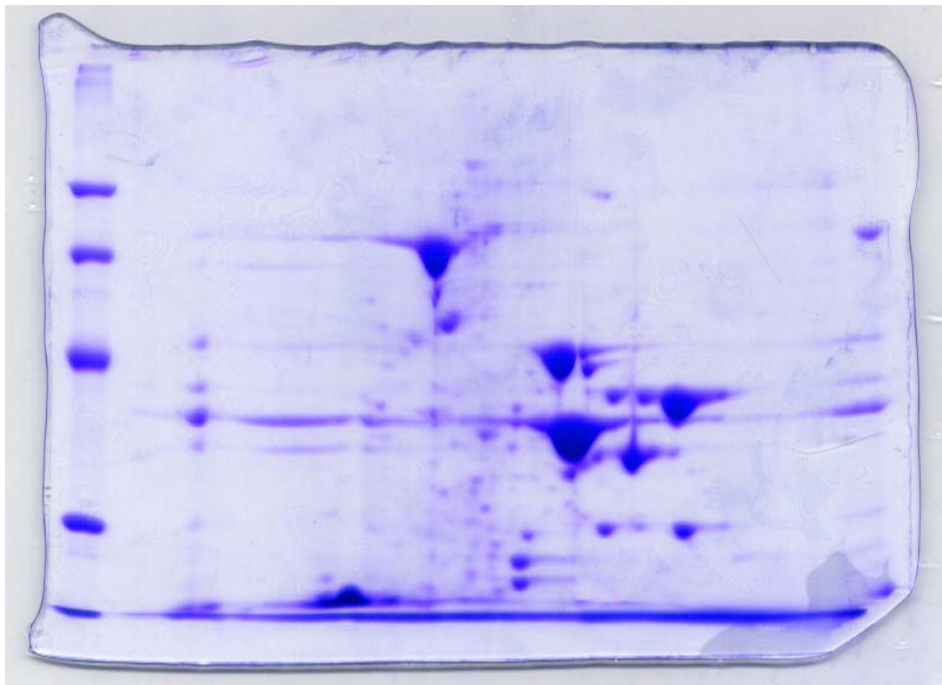

**Supplementary Figure S3. Uncropped images of Figure 3.**

a 70-kDa protein

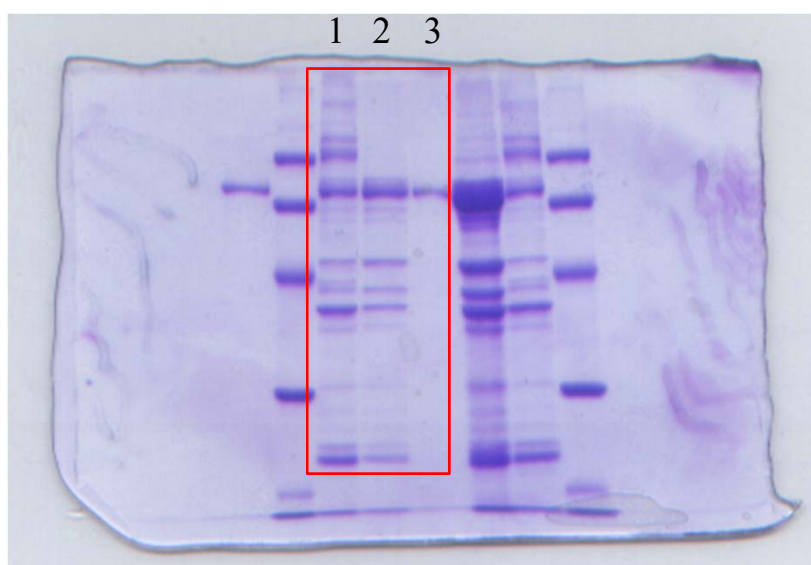

- 1: whole Tris-soluble fraction
- 2: the 40–60% ammonium sulfate precipitate
- 3: reversed-phase HPLC fraction

a 43-kDa protein

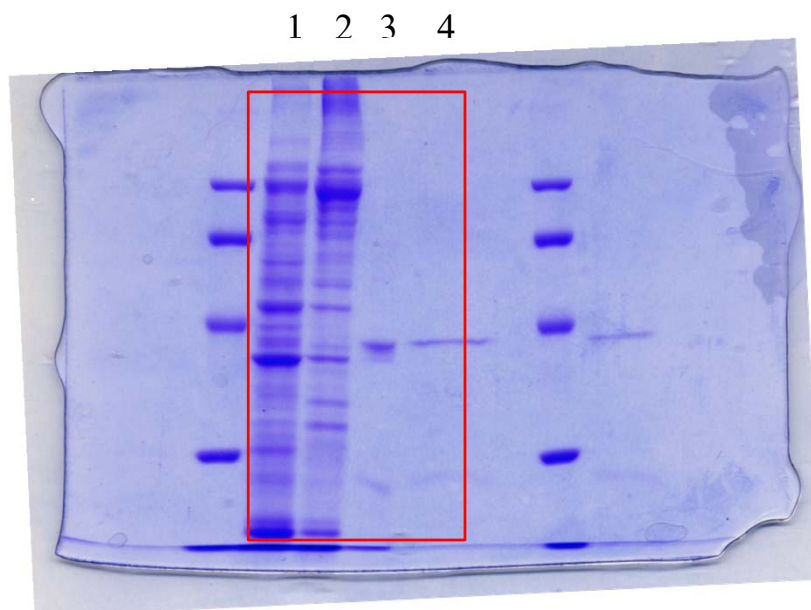

- 1: whole Tris-soluble fraction
- 2: the 20–40% ammonium sulfate precipitate
- 3: anion-exchange chromatography fraction
- 4: hydrophobic interaction chromatography fraction

**Supplementary Figure S4. Uncropped images of Figure 4.**

Red boxes denote the areas shown in Figure 4.

## P75 homologue

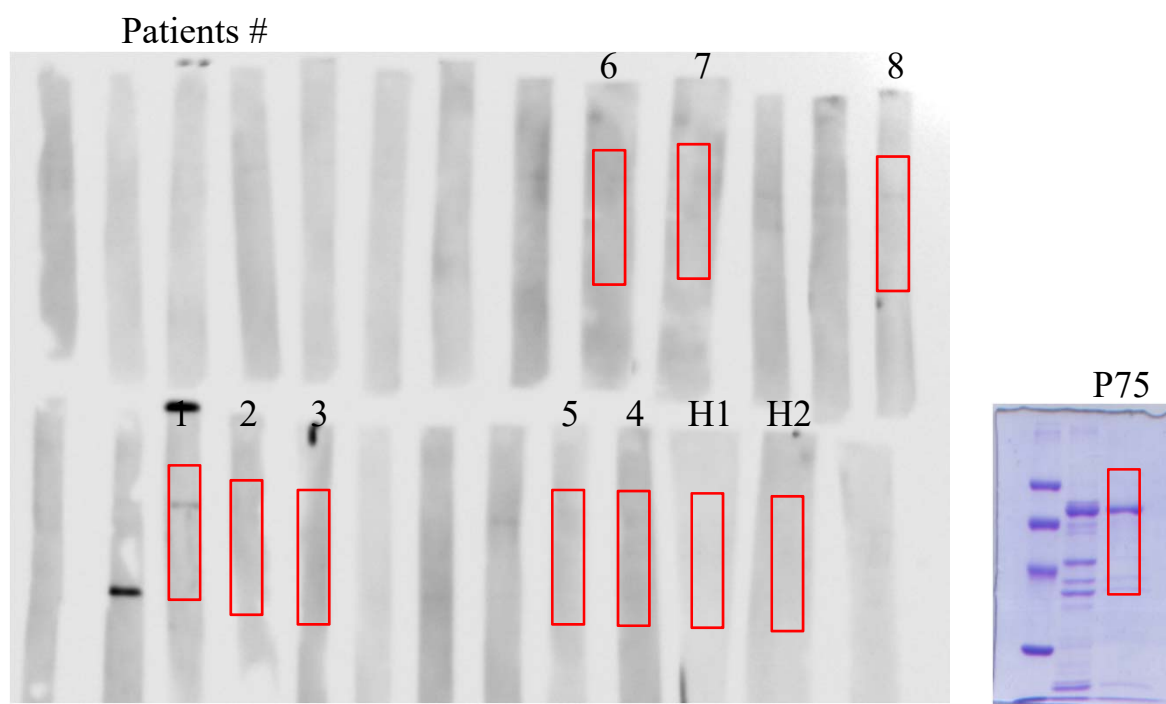

## FBPA

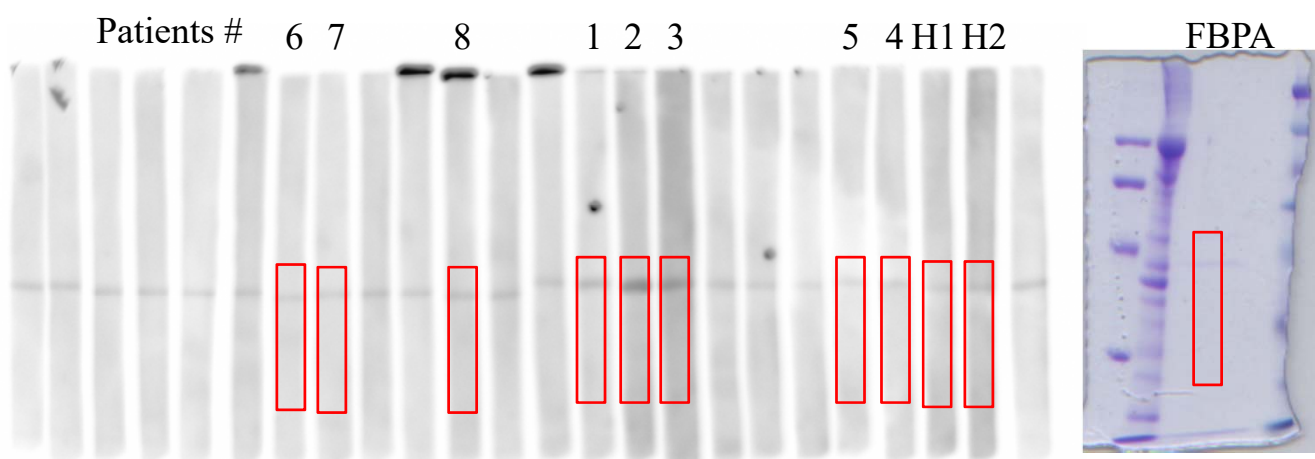

H: healthy subjects

P75: purified native P75  
homologue

FBPA: purified native FBPA

## Supplementary Figure S5. Uncropped images of Figure 5.

Red boxes denote the areas shown in Figure 5.
